# Supplementary material for: Creating dynamic SERS hotspots on the surface of pH-responsive microgels for direct detection of crystal violet in solution
Source: Royal Society of Chemistry journal article supplement (doi:10.1039/c7ra05567f), 2017-01-01
Supplement: c7ra05567f1.pdf [file c7ra05567f1.pdf]

## Supplementary data of

# Creating dynamic SERS hotspots on the surface of pH-responsive microgels for direct detection of crystal violet in solution

Huaxiang Chen,<sup>a</sup> Tingting You,<sup>b</sup> Li Jiang,<sup>c</sup> Yukun Gao<sup>a</sup> and Penggang Yin<sup>\*a</sup>

Key Laboratory of Bio-inspired Smart Interfacial Science and Technology of Ministry of Education, School of Chemistry, Beihang University, Beijing, China.

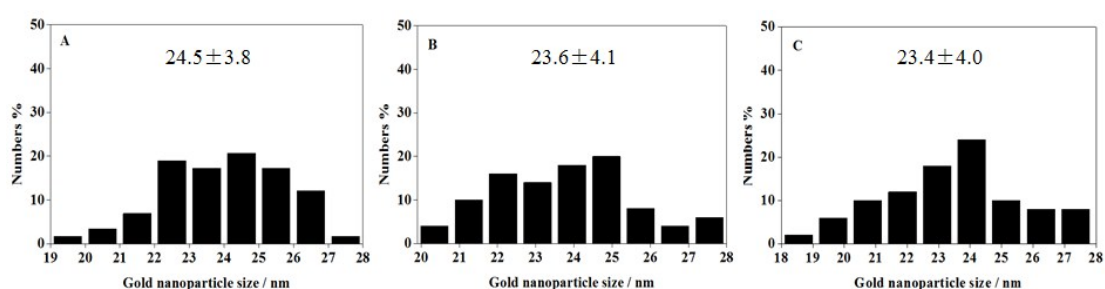

**Figure S1.** Gold nanoparticle size statistics of AuNPs/P2VP-1 (A), AuNPs/P2VP-2 (B) and AuNPs/P2VP-3 (C).

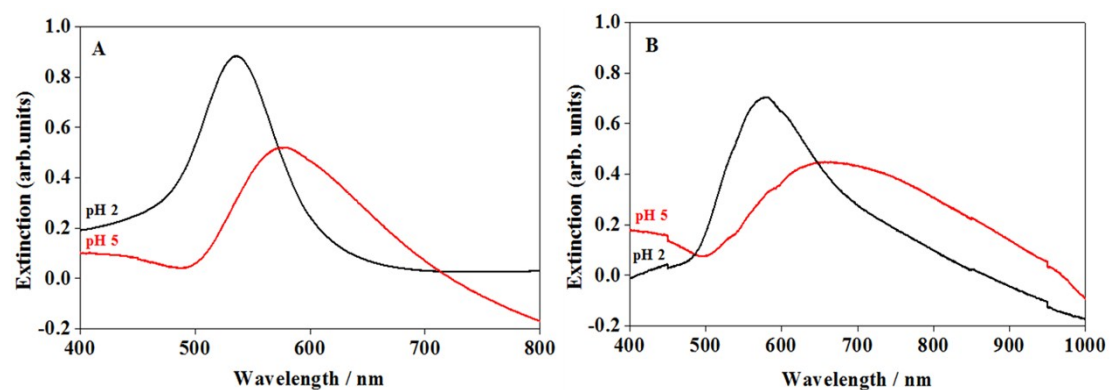

**Figure S2.** UV-vis spectra of AuNPs/P2VP-1 (A) and AuNPs/P2VP-3 (B) at pH values of 2.0 or 5.0

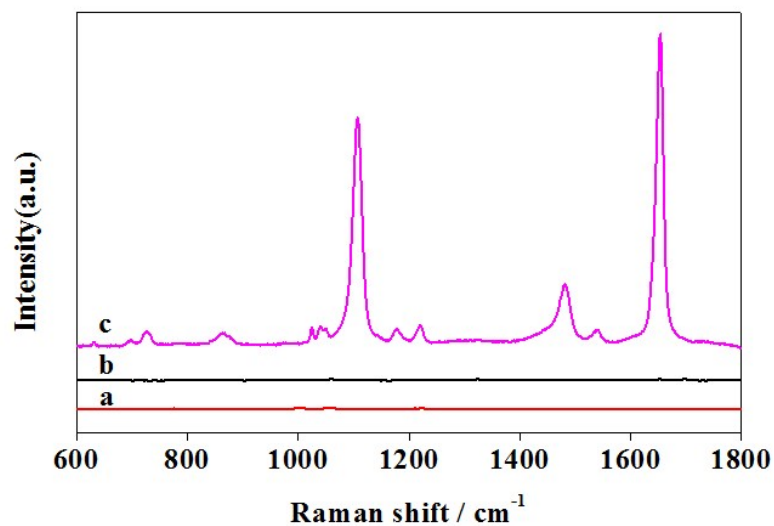

**Figure S3.** (a) Raman spectra of P2VP microgels; (b) Raman spectra of AuNPs/P2VP-2 microgels; (c) SERS spectra of  $10^{-4}$  M PMBA adsorbed on AuNPs/P2VP-2. The acquisition time was 2 s.

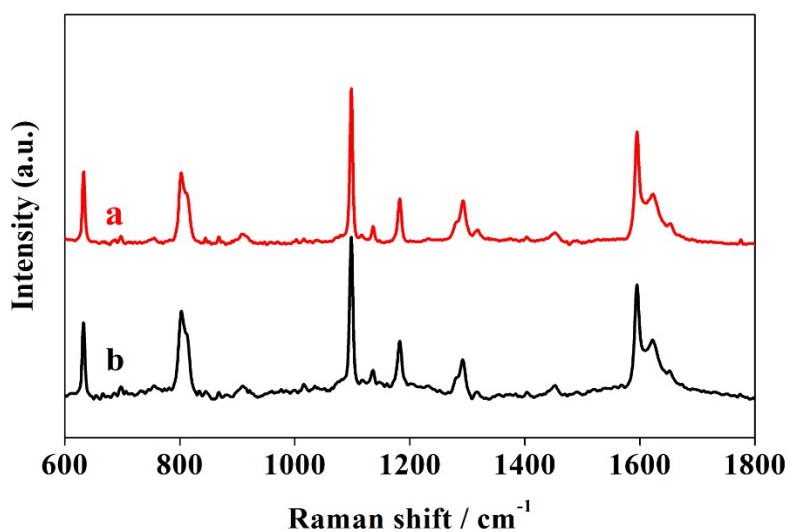

**Figure S4.** (a) Raman spectra of PMBA, detected after dropwise PMBA saturated aqueous solution with pH values of 2 to the wafer ; (b) Raman spectra of PMBA, detected after dropwise PMBA saturated aqueous solution with pH values of 5 to the wafer.

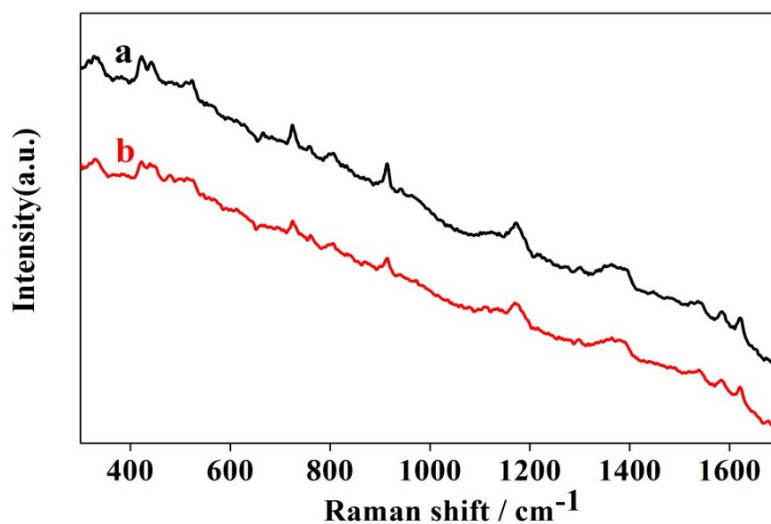

**Figure S5.** (a) Raman spectra of CV, detected at CV saturated aqueous solution with a pH of 2 ; (b) Raman spectra of CV, detected at CV saturated aqueous solution with a pH of 5.

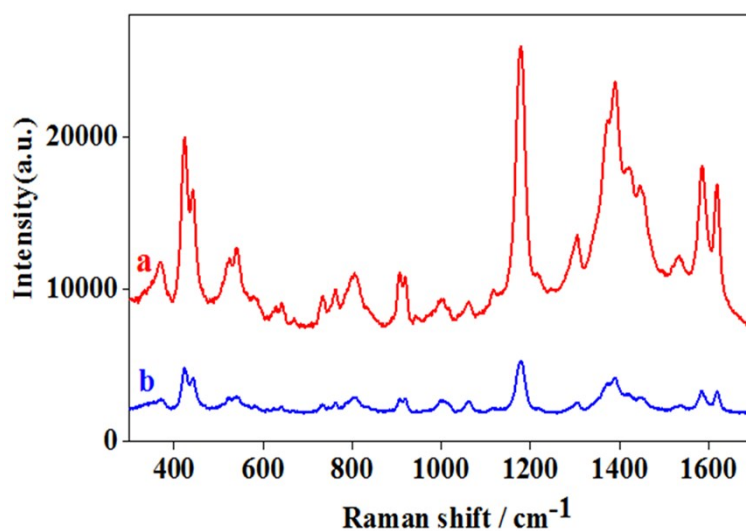

**Figure S6.** SERS spectra of  $10^{-6}$ M CV adsorbed on AuNPs/ P2VP-2 microgels under the condition of pH values of 2, detected at pH values of 5(a) or 2 (b). The laser power was 3 mW and the acquisition time was 10 s.
